1 **Title:** A novel ENU-induced ankyrin-1 mutation impairs parasite invasion and increases erythrocyte  
2 clearance during malaria infection in mice

3

4 **Author list and affiliations**

5 Hong Ming Huang<sup>1</sup>, Denis C. Bauer<sup>2</sup>, Patrick M. Lelliott<sup>3</sup>, Andreas Greth<sup>4</sup>, Brendan J. McMorran<sup>1</sup>,  
6 Simon J. Foote<sup>1</sup>, Gaetan Burgio<sup>1\*</sup>

7

8 <sup>1</sup> Department of Immunology and Infectious Disease, John Curtin School of Medical Research,  
9 Australian National University, ACT, Australia.

10 <sup>2</sup> CSIRO, Sydney, NSW, Australia.

11 <sup>3</sup> IFRc Research Building, Osaka University, 3-1 Yamada-oka, Suita, Osaka 565-0871, Japan.

12 <sup>4</sup> synaps studios GmbH, Rebmoosweg 73A, CH-5200 Brugg, Switzerland.

13

14 **Corresponding author\***

15 Dr. Gaetan Burgio

16 The John Curtin School of Medical Research, Australian National University,

17 131 Garran Road, ACT 2601, Australia.

18 [Gaetan.burgio@anu.edu.au](mailto:Gaetan.burgio@anu.edu.au)

19 +61 2 612 59428

20 **Abstract**

21

22 Genetic defects in various red blood cell (RBC) cytoskeletal proteins have been long associated with  
23 changes in susceptibility towards malaria infection. In particular, while ankyrin (Ank-1) mutations  
24 account for approximately 50% of hereditary spherocytosis (HS) cases, an association with malaria is  
25 not well-established, and conflicting evidence has been reported. We describe a novel N-ethyl-N-  
26 nitrosourea (ENU)-induced ankyrin mutation MRI61689 that gives rise to two different ankyrin  
27 transcripts: one with an introduced splice acceptor site resulting a frameshift, the other with a  
28 skipped exon. *Ank-1*<sup>(MRI61689/+)</sup> mice exhibit an HS-like phenotype including reduction in mean  
29 corpuscular volume (MCV), increased osmotic fragility and reduced RBC deformability. They were  
30 also found to be resistant to rodent malaria *Plasmodium chabaudi* infection. Parasites in *Ank-*  
31 *1*<sup>(MRI61689/+)</sup> erythrocytes grew normally, but red cells showed resistance to merozoite invasion.  
32 Uninfected *Ank-1*<sup>(MRI61689/+)</sup> erythrocytes were also more likely to be cleared from circulation during  
33 infection; the “bystander effect”. This increased clearance is a novel resistance mechanism which  
34 was not observed in previous ankyrin mouse models. We propose that this bystander effect is due to  
35 reduced deformability of *Ank-1*<sup>(MRI61689/+)</sup> erythrocytes. This paper highlights the complex roles  
36 ankyrin plays in mediating malaria resistance.

37

## 38 Introduction

39 Malaria is a mosquito-borne disease caused by the protozoan *Plasmodium*, responsible for many  
40 deaths every year, mostly children <sup>1</sup>. In endemic regions with limited healthcare access, host  
41 genetics is one of the major determinants of malaria susceptibility and survival <sup>2-4</sup>. This is evident  
42 from the distributions of various genetic polymorphisms in humans, such as Duffy antigen negativity  
43 and sickle cell trait, which coincide with malaria distribution <sup>3,5,6</sup>. It is thought that these genetic  
44 polymorphisms confer protection against malaria, thus providing a survival advantage in the face of  
45 malaria-induced mortality <sup>7,8</sup>.

46 In addition, these polymorphisms also provide crucial insights into host-parasite interactions.  
47 *Plasmodium* relies on a favourable host environment in order to thrive, many erythrocyte-related  
48 polymorphisms have been discovered that interfere with parasite survival thus contributing to  
49 malaria resistance. These include polymorphisms that affect the cytoskeleton of erythrocytes, such  
50 as Southeast Asian Ovalocytosis (SAO), hereditary elliptocytosis (HE) and spherocytosis (HS) <sup>9-13</sup>.  
51 Several hypotheses have been proposed for the mechanisms by which they confer malaria  
52 protection, including reduced erythrocyte invasion, intra-erythrocytic growth and cytoadherence <sup>8,13-</sup>  
53 <sup>19</sup>. However, due to the heterogeneity of the manifestation of these disorders in the human  
54 population, contradicting evidences for resistance mechanisms has often been presented. A study  
55 done by Facer <sup>13</sup> showed that only patients carrying certain spectrin mutations have impaired  
56 parasite invasion of red blood cells (RBC), but not others that also exhibited HE symptoms. A similar  
57 observation was reported by Chishti, et al. <sup>17</sup>, where individuals with defective protein 4.1 exhibited  
58 intra-erythrocytic growth inhibition, but not those with glycophorin C defects, despite the fact that  
59 both defects gave rise to HE. These differences in malaria resistance mechanisms remained largely  
60 unexplored, and further studies in this aspect would potentially provide useful insight into host-  
61 parasite interactions.

62 The RBC cytoskeletal protein ankyrin-1 (ANK-1), is a 210kDa protein responsible for connecting the  
63 spectrin network with the RBC membrane through interactions with Band 3, protein 4.2 and the  
64 Rhesus complex<sup>20-22</sup>. Spherocytosis is a genetic disorder where RBCs are abnormally small and are  
65 known as spherocytes. ANK-1 mutations account for more than 50% of human HS cases<sup>23</sup>. However,  
66 similar to SAO and HE, HS is a heterogeneous disorder where the symptoms vary greatly depending  
67 on the mutations. The disorder can range from asymptomatic through to severe anaemia requiring  
68 splenectomy<sup>24</sup>. Despite a possible association with malaria, HS is actually common in Northern  
69 European and Japanese populations<sup>25-28</sup>, and much rarer in other populations<sup>29</sup>. Nevertheless,  
70 several *in vitro* and *in vivo* studies have repeatedly reported association between HS and malaria  
71 resistance, and several mechanisms have been suggested. An *in vitro* study done by Schulman, et al.  
72<sup>16</sup> using RBCs from HS patients suggested that parasite invasion and growth in these erythrocytes  
73 was impaired. This is further supported by studies done in mice with ankyrin mutations. Both *Ank-*  
74 *1*<sup>(nb/nb)</sup> and *Ank-1*<sup>(MRI23420/+)</sup> have shown inhibited intra-erythrocytic growth and erythrocyte invasion  
75 possibly due to spectrin and ankyrin deficiency, respectively<sup>30,31</sup>. On the other hand, another  
76 mutation described by Rank, et al.<sup>32</sup>, *Ank-1*<sup>1674/+</sup>, parasite invasion appeared to be normal in these  
77 erythrocytes. Instead, increased erythrocyte fragility was proposed as a contributing factor for  
78 increased malaria resistance<sup>32</sup>. Taking these observations together, it is possible that disruption to  
79 erythrocyte cytoskeletons can mediate multiple mechanisms of resistance.

80 In a large phenotypic N-ethyl-N-nitrosourea (ENU) mutagenesis screen, using either abnormal red  
81 cells or resistance to malaria as to the screened phenotypes, we identified many novel mutations  
82 that give rise to RBC abnormalities and consequently malaria resistance in mice. We report here an  
83 ENU-induced mutation in the ankyrin-1 gene (*Ank-1*<sup>(MRI61689)</sup>) which was found to exhibit a HS-like  
84 phenotype, with significantly lower RBC volumes, increased osmotic fragility and decreased  
85 deformability. *Ank-1*<sup>(MRI61689)</sup> also confers resistance towards *Plasmodium chabaudi adami* infection  
86 in mice, and *Ank-1*<sup>(MRI61689/+)</sup> mice were shown to show both reduced merozoite invasion and  
87 increased RBC clearance, possibly as a consequence of reduced red blood cell deformability.

88

## 89 **Results**

90 The MRI61689 mutation gives rise to an hereditary spherocytosis-like phenotype

91 The G1 mouse carrying the MRI61689 mutation was initially identified from an ENU suppressor  
92 screen for the recessive mutation db/db. The G1 MRI61689 exhibited abnormal blood parameters on  
93 an ADVIA haematological analyser, with reduced MCV of 48.6fL compared to the background of  
94 53.3±0.5fL. This MCV values from the B6.BKS(D)-Lepr<sup>db</sup>/J background is comparable to C57BL/6 mice.  
95 We crossed the G1 founder mouse with B6.BKS(D)-Lepr<sup>db</sup>/J to produce G2 mice where approximately  
96 half of the animals exhibited an abnormal phenotype (Table 1). The affected G2 progeny, which  
97 were obligate heterozygotes for the ENU-induced mutation, showed reduction in MCV (46.1±0.2fL)  
98 compared to unaffected progeny (51.4±0.4fL), lower mean corpuscular haemoglobin (MCH)  
99 (13.5±0.1pg compared to 14.6±0.1pg of wild-type), elevated RBC count (11.1±0.1x10<sup>9</sup> cells/ml  
100 compared to 10.5±0.1x10<sup>9</sup> cells/ml of wild-type) (Table 1). No differences were observed for total  
101 haemoglobin (HB), mean corpuscular haemoglobin concentration (MCHC), white blood cell (WBC)  
102 count, platelets count (PLT) or reticulocyte percentage (Table 1).

103 However, when two affected mice were intercrossed, a quarter of the pups were found to die within  
104 1 week postnatally, suggesting homozygosity for MRI61689 might be incompatible with life. Blood  
105 smears were taken from these pups and compared with the other affected and unaffected mice. The  
106 heterozygotes have slightly smaller RBCs but no target cells or spherocytes were observed (Figure  
107 1a). Conversely, homozygous mice had significantly smaller RBCs with anisocytosis, fragmented RBCs,  
108 acanthocytes and reticulocytosis (Figure 1a). Under SEM, RBCs of heterozygous mice seemed to have  
109 less distinct discoid shape, but otherwise no distinguishing features were observed. (Figure 1b). On  
110 the other hand, the RBCs of homozygous mice appeared very deformed, acanthocytic and appeared  
111 to lack the discoid shape (Figure 1b).

112 When subjected to osmotic stress, RBCs of heterozygous mice showed significantly increased  
113 fragility compared to wild-type erythrocytes (with 50% haemolysis at approximately 5.6 g/L  
114 compared to 4.5 g/L of wild-type) (Figure 1c). The RBC deformability was assessed using an *in vitro*  
115 spleen retention assay by filtering RBCs through a layer of beads with varying sizes. This is thought to  
116 model splenic filtration *in vivo*, and the retention is thought to indicate deformability. As shown in  
117 Figure 1d, the heterozygous mice exhibited up to 70% of the RBCs retention compared to wild-type  
118 of approximately 3.5% retention, thus suggesting a significantly reduced RBC deformability.

119

120 MRI61689 carries a splice site mutation in *Ank-1* gene resulting in an alternative transcript and exon  
121 skipping

122 To identify the causative mutation responsible for this abnormal RBC count, we sequenced the  
123 exomes of 2 heterozygous mice. Exome sequencing revealed a number of variants. These were  
124 prioritised based on filters as shown in Table 2. Through further genotyping using Sanger sequencing,  
125 a mutation in *Ank-1* gene was found to correlate with all the affected mice and was proven to  
126 segregate perfectly with the reduced MCV for over 3 generations of mouse crosses. The mutation  
127 was found in the 17-18 intron of *Ank-1* gene, with T to A transversion 11 base pair upstream of exon  
128 18 (IVS17-11T>A) (Figure 2a). This is situated in the ankyrin-repeats domain involved in band 3  
129 binding. We proposed that the mutation introduced a new acceptor splice site for exon 18,  
130 potentially leading to a frameshift mutation.

131 To assess this hypothesis, transcript analysis was performed. Embryonic liver RNA was extracted,  
132 cDNA was synthesized and PCR-amplified using primers listed in the experimental procedures. Figure  
133 2b shows the PCR products of embryonic liver cDNA from non-mutant, *Ank-1*<sup>(MRI61689/+)</sup> and *Ank-*  
134 *1*<sup>(MRI61689/MRI61689)</sup> when amplified using primer set 1, which covers exon 17 to 21. Bands of  
135 approximately 400bp can be observed in all the genotypes, but *Ank-1*<sup>(MRI61689/MRI61689)</sup> also exhibited a  
136 second smaller product of approximately 300bp length. We proposed that this second band resulted

137 from exon skipping. Sanger sequencing of these PCR products revealed that the 300bp product  
138 lacked exon 18, confirming that the exon 18 was skipped, and exon 19 was directly connected to  
139 exon 17 during transcription (Figure 2c). This transcript is predicted to produce a shortened, in-  
140 frame 207kDa ANK-1 protein.

141 To examine the effect of MRI61689 mutation in heterozygous mice, we further designed a primer set  
142 containing the predicted acceptor splice site (primer set 2). Figure 2d shows that the mutant  
143 transcript is only present in *Ank-1*<sup>(MRI61689/+)</sup> and *Ank-1*<sup>(MRI61689/MRI61689)</sup> mice, as predicted. Further  
144 Sanger sequencing revealed an insertion of 11bp into the transcript adding an additional donor  
145 splicing site and causing a frameshift mutation in the exon that would result in a premature stop  
146 codon at amino acid position 724, as illustrated in Figure 2e, thus giving rise to a truncated protein of  
147 78.5kDa. Therefore the homozygous mice exhibit a mutation at 11 bp upstream of the exon 18  
148 donor splicing site resulting in two alternative transcripts: the skipping of exon 18 and an 11bp  
149 insertion and creation of an additional donor splicing site leading to frameshift mutation that would  
150 result in a premature stop codon and a truncated protein.

151 We hypothesize that this mutation would reduce the *Ank-1* expression levels. We assessed this  
152 hypothesis by examining the gene expression levels of *Ank-1* in embryonic liver using qPCR at mRNA  
153 level and Western blotting at protein level in mature RBCs. As shown in Figure 3a, *Ank-1* mRNA  
154 levels in both *Ank-1*<sup>(MRI61689/+)</sup> and *Ank-1*<sup>(MRI61689/MRI61689)</sup> E14 embryonic livers were significantly  
155 reduced, up to 60% and 80% reduction compared to the wild-type, respectively. However, no  
156 significant reduction in the full length ANK-1 (210kDa) protein levels was observed in both  
157 Coomassie and Western blotting (Figure 3b-d). No truncated form of ANK-1 (78.5kDa) was observed  
158 in *Ank-1*<sup>(MRI61689/+)</sup> erythrocytes. Furthermore, no reduction was observed for the protein levels of  
159 other cytoskeletal proteins, including Band 3, protein 4.2, alpha- and beta-spectrin (Figure 3b and 3c).  
160 This suggested that erythrocyte protein levels might be compensated by the WT allele in *Ank-*  
161 *1*<sup>(MRI61689/+)</sup> mice, and the reduction in *Ank-1* mRNA levels did not seem to affect the protein levels.

162

163 *Ank-1*<sup>(MRI61689/+)</sup> mice are resistant to *Plasmodium chabaudi* infection

164 We hypothesized that the *Ank-1*<sup>(MRI61689)</sup> mutation confers malaria resistance. The malaria  
165 susceptibility of *Ank-1*<sup>(MRI61689/+)</sup> mice was examined by injecting a lethal dose of *Plasmodium*  
166 *chabaudi adami DS*, a murine strain of malaria that models the *Plasmodium falciparum* erythrocytic  
167 stage<sup>33</sup>. The *Ank-1*<sup>(MRI61689/+)</sup> mice exhibited significantly lower peak parasitemia, with only  
168 approximately 13% parasitemia compared to 52% parasitemia of wild-type (Figure 4a) but no delay  
169 in the appearance of parasites was observed. In addition, *Ank-1*<sup>(MRI61689/+)</sup> have a significantly  
170 increased survival rate, where all the *Ank-1*<sup>(MRI61689/+)</sup> mice survived the infection (Figure 4b)  
171 compared to the 16% survival of wild-type mice. Since *Ank-1*<sup>(MRI61689)</sup> directly affects the red cell  
172 (cytoskeletal protein), we hypothesized that the resistance was likely due to a RBC-autonomous  
173 effect. Therefore, we postulated three mechanisms of *P. chabaudi* resistance in *Ank-1*<sup>(MRI61689/+)</sup> mice.  
174 Firstly, the maturation of parasite inside the *Ank-1*<sup>(MRI61689/+)</sup> erythrocytes could be impaired leading  
175 to reduced growth and death of parasites<sup>31</sup>. Secondly, the *Ank-1*<sup>(MRI61689/+)</sup> erythrocytes might be  
176 resistant to merozoite invasion, which resulted in reduced parasitemia and delayed course of  
177 infection<sup>15</sup>. Finally, the infected *Ank-1*<sup>(MRI61689/+)</sup> erythrocytes might more prone to destruction during  
178 the course of infection (increased clearance), thus posing a challenge for the parasite to establish a  
179 successful infection<sup>34</sup>.

180

181 *Ank-1*<sup>(MRI61689)</sup> does not impair the intra-erythrocytic growth of *P. chabaudi*.

182 To elucidate the possible mechanisms of resistance, the effect of the *Ank-1*<sup>(MRI61689/+)</sup> mutation on  
183 parasite intra-erythrocytic growth was investigated using the TUNEL assay at 1-10% parasitemia.  
184 TUNEL detects DNA fragmentation, a marker for apoptosis or necrosis. In conjunction with a DNA  
185 fluorescent dye, DAPI, it is possible to detect dying parasites in the erythrocytes (Figure 4c)<sup>31,35</sup>. We



186 measured the TUNEL-positivity of *P. chabaudi* in *Ank-1*<sup>(MRI61689/+)</sup> erythrocytes during the late  
187 trophozoite stage of the infections, which was the portion of the parasite lifecycle affected by the  
188 *Ank1* mutation in the *Ank-1*<sup>(MRI23420/+)</sup> line. As shown in Figure 4d, no differences was observed in the  
189 percentage of TUNEL-positive parasites in both wild-type and *Ank-1*<sup>(MRI61689/+)</sup> erythrocytes ( $24.7 \pm 2.3\%$   
190 in *Ank-1*<sup>(MRI61689/+)</sup> mice compared to  $29.5 \pm 2.9\%$  in wild-type). This indicated that *Ank-1*<sup>(MRI61689)</sup> did  
191 not impair parasite intra-erythrocytic growth.

192

193 *Ank-1*<sup>(MRI61689/+)</sup> erythrocyte is resistant to *P. chabaudi* invasion, and have increased clearance from  
194 circulation

195 Erythrocyte invasion and clearance were assessed via an *in vivo* erythrocyte tracking (IVET) assay.  
196 Labelled blood of wild-type and *Ank-1*<sup>(MRI61689/+)</sup> mice were injected into infected wild-type mice  
197 during merozoite invasion to examine the ability of *Plasmodium chabaudi* to invade and grow within  
198 erythrocytes of both genotypes. The result compared the percentage of parasitized cells of both  
199 genotypes and expressed as a ratio of parasitemia in *Ank-1*<sup>(MRI61689/+)</sup> RBC to wild-type RBC  
200 populations. As shown in Figure 4e, lower parasitemia ratio (approximately 0.55) was observed from  
201 30 minutes after injection with labelled blood, and was consistently lower in *Ank-1*<sup>(MRI61689/+)</sup> blood  
202 over 36 hours post injection, which indicates a lower invasion rate into the *Ank-1*<sup>(MRI61689/+)</sup> RBCs.  
203 Additionally, the remaining proportion of labelled RBCs was also monitored over the course of the  
204 assay. A significant reduction of *Ank-1*<sup>(MRI61689/+)</sup> erythrocytes in infected mice compared to wild-type  
205 erythrocytes was observed, with up to a 45% reduction in *Ank-1*<sup>(MRI61689/+)</sup> RBC number compared  
206 with wild-type (Figure 4f). On the other hand, a smaller reduction was observed for *Ank-1*<sup>(MRI61689/+)</sup>  
207 erythrocytes compared to wild-type in uninfected mice, suggesting *Ank-1*<sup>(MRI61689/+)</sup> RBCs are more  
208 likely to get cleared from circulation during malaria infection. As the percentage of infected  
209 erythrocytes was low (5-20%) (Supp. figure 1), this indicates that the majority of the RBCs getting  
210 cleared were uninfected RBCs, possibly as a result of bystander effect. This experiment suggested

211 that two possible mechanisms of resistance are both operating to produce the lower parasitemia  
212 and increased survival in *Ank-1*<sup>(MRI61689/+)</sup> mice, the reduction of parasite invasion and increased  
213 clearance of *Ank-1*<sup>(MRI61689/+)</sup> RBCs.

214

## 215 Discussion

216 We report a novel mutation in *Ank-1* gene, MRI61689, causing a hereditary spherocytosis-like  
217 phenotype, with reduced MCV, increased osmotic fragility and reduced deformability. MRI61689 is  
218 an intronic mutation between exon 17 and 18 where two possible splice variants could arise, one  
219 has an introduced acceptor site resulting a frameshift, whereas the other consists of a skipped exon  
220 18. The *Ank-1* mRNA levels were reduced, but no reduction in protein levels were observed. The  
221 predicted truncated form (78.5kDa) was also not observed. *Ank-1*<sup>(MRI61689/+)</sup> mice also have increased  
222 resistance to *Plasmodium chabaudi* infections, and the erythrocyte invasion was impaired but the  
223 intra-erythrocytic growth appeared normal. The *Ank-1*<sup>(MRI61689/+)</sup> RBCs were also more likely to be  
224 cleared from circulation during infection, an observation independent of number of parasitized  
225 erythrocytes.

226 In comparison of *Ank-1*<sup>MRI61689</sup> mice to other previously described *Ank-1* mouse models, they  
227 appeared comparable to *Ank-1*<sup>MRI23420</sup> mice, but more severe than *Ank-1*<sup>1674</sup> and *Ank-1*<sup>nb</sup> mice. More  
228 specifically, most homozygous *Ank-1*<sup>(MRI61689)</sup> mice died within a week after birth, similar to  
229 homozygous *Ank-1*<sup>MRI23420</sup> mice, while homozygous *Ank-1*<sup>1674</sup> and *Ank-1*<sup>nb</sup> mice were viable<sup>30,32</sup>.  
230 However, no notable differences were observed in heterozygous *Ank-1*<sup>MRI61689</sup> mice in terms of their  
231 RBC microcytosis, morphology and susceptibility to osmotic stress compared to heterozygous *Ank-*  
232 *1*<sup>1674</sup> and *Ank-1*<sup>MRI23420</sup> mice<sup>31,32</sup>. However, similar to *Ank-1*<sup>1674/+</sup> mice and unlike *Ank-1*<sup>(MRI23420/+)</sup> mice,  
233 *Ank-1*<sup>(MRI61689/+)</sup> mice exhibited similar levels of ankyrin and other RBC cytoskeletal protein to wild-  
234 type, which might suggest compensation by the wild-type allele, and thus warrants further studies.

235 In humans, many *ANK-1* mutations that result in frameshift have been described, most of which  
236 situated in the band 3 binding domain towards the N terminus<sup>36,37</sup>. While no *Ank-1*<sup>(MRI61689)</sup>  
237 homologous mutation has been described in humans, a frameshift mutation has been reported to be  
238 in the exon 17, called Ankyrin Osaka I, which gave rise to symptomatic HS<sup>37</sup>. Furthermore, exon  
239 skipping in human *ANK-1* gene has also been documented. Edelman, et al.<sup>38</sup> reported a HS patient  
240 exhibiting a severe ankyrin-deficient HS due to an introduction of a new splice acceptor site for exon  
241 17, known as ankyrin<sup>Ankara</sup>. Under further examination, this mutation was found to give rise to  
242 multiple splice forms, including insertions and skipped exons. Most splice forms with insertion were  
243 expected to cause frameshift, potentially leading to premature termination of ankyrin<sup>38</sup>. This finding  
244 is in agreement with what we observed for *Ank-1*<sup>(MRI61689/MRI61689)</sup> mice, where frameshift caused by  
245 new splice acceptor site, leading to high mortality rate with severe HS-like phenotype in *Ank-*  
246 *1*<sup>(MRI61689/MRI61689)</sup> mice. It is likely that the surviving *Ank-1*<sup>(MRI61689/MRI61689)</sup> mice relied on the exon-  
247 skipping splice form to produce in-frame functional *Ank-1* proteins. However, further studies are  
248 required for support this hypothesis.

249 In terms of the response to malaria infection, *Ank-1*<sup>(MRI61689/+)</sup> mice exhibited similar degree of  
250 malaria resistance as *Ank-1*<sup>(MRI23420/+)</sup> and *Ank-1*<sup>1674/+</sup> mice, with at least 30-40% reduction in  
251 parasitemia and increased survival<sup>31,32</sup>, and unlike *Ank-1*<sup>nb/+</sup> mice with only 10% reduction<sup>30</sup>.  
252 Previous studies suggested the reduction in erythrocyte invasion and intra-erythrocytic growth to be  
253 the major resistance mechanisms<sup>30,31</sup>. However, normal parasite invasion was reported in *Ank-1*<sup>1674/+</sup>  
254 mice<sup>32</sup>. As a result, we have explored the potential mechanisms of *Ank-1*<sup>MRI61689/+</sup> mice in this study  
255 in attempt to elucidate the complex roles ankyrin plays during malaria infections.

256 First, we report that *Ank-1*<sup>(MRI61689/+)</sup> mice exhibit normal parasite intra-erythrocytic growth (Figure  
257 4d), in contrast to *Ank-1*<sup>(MRI23420/+)</sup> mice. TUNEL assay detects the presence of DNA fragmentation  
258 which occurs during apoptosis and necrosis<sup>39</sup>, which indicates dying parasites in RBCs<sup>35</sup>. McMorran,  
259 et al.<sup>35</sup> reported TUNEL-positive parasites in C57BL/6 wild-type mice at a level consistent with the

260 observations in this study. On the other hand, Greth, et al.<sup>31</sup> reported a lower TUNEL-positive in  
261 their SJL/J wild-type mice, which most likely due to differences in the genetic background of  
262 experimental mice. Nevertheless, we did not observe abnormal parasite morphology under light  
263 microscopy unlike *Ank-1*<sup>(MRI23420/+)</sup> mice, which support the deductions of parasite death from the  
264 TUNEL assays.

265 In terms of parasite invasion, *Ank-1*<sup>(MRI61689/+)</sup> RBCs were found to be more resistant to merozoite  
266 invasion as shown in the IVET assay (Figure 4e). The *Ank-1*<sup>(MRI61689/+)</sup> erythrocytes were less infected  
267 compared to the wild-type 30 minutes after injection during merozoite invasion, and stayed  
268 consistently lower compared to wild-type throughout the erythrocytic cycle. This reduction in  
269 invasion has also been observed in *Ank-1*<sup>(MRI23420/+)</sup> mice<sup>31</sup>. In contrast, Rank, et al.<sup>32</sup> reported no  
270 difference in parasite invasion for *Ank-1*<sup>1674/+</sup> mice, indicating a different effect mediated by *Ank-1*<sup>1674</sup>  
271 mutation compared to *Ank-1*<sup>(MRI23420)</sup> and *Ank-1*<sup>(MRI61689)</sup> mutations.

272 From these comparisons with other ankyrin mouse models, it is evident that RBC cytoskeleton plays  
273 an important yet complex role during malaria infections. However the exact mechanism for each of  
274 these different phenotypes for each ankyrin haplotype remains elusive, different ankyrin mutations  
275 can exert different effects on the parasites depending on the location of the mutations, giving rise to  
276 multiple resistance mechanisms. This hypothesis is also consistent with the heterogeneous HS  
277 symptoms associated with ankyrin mutations, which highlights the complicated interactions  
278 between RBC cytoskeletons and malaria parasites.

279 On the other hand, one important observation from the IVET assay is the rapid clearance of *Ank-*  
280 *1*<sup>(MRI61689/+)</sup> erythrocytes from the circulation within 36 hours post-injection, up to 40% of the initial  
281 RBC number (Figure 4f). However, at this timepoint the parasitemia of the host mice was only 5-20%  
282 (Supp. Figure 1a), therefore the rate of RBC clearance cannot be explained by the clearance of  
283 parasitized RBCs, instead, it is likely that the majority of the RBCs being cleared were uninfected. In  
284 comparison, no loss was observed for wild-type erythrocytes in both infected and uninfected mice.

285 Since, in these experiments both wild-type and *Ank-1*<sup>(MRI61689/+)</sup> blood were subjected to the same  
286 host environment simultaneously, it implies that the clearance of *Ank-1*<sup>(MRI61689/+)</sup> erythrocytes is cell  
287 autonomous, rather than due to other effects of the host animal. This is the first observation of  
288 increased, uninfected RBC clearance associated with an ankyrin mutation. Bystander clearance is  
289 typically observed in inflammation, such as during sepsis<sup>40</sup>, and is thought to cause severe malaria  
290 anaemia during malaria infection in humans through the destruction of normal uninfected RBCs<sup>41,42</sup>.  
291 It is possible that *Ank-1*<sup>(MRI61689)</sup> causes a more exaggerated bystander effect during malaria infection,  
292 leading to a rapid reduction of *Ank-1*<sup>(MRI61689/+)</sup> erythrocyte numbers.

293 Reduced RBC deformability was proposed to be one of the mechanisms of bystander clearance  
294 during malaria anaemia through phagocytosis and splenic filtration<sup>43,44</sup>. From the *in vitro* spleen  
295 retention assay (Figure 1d), *Ank-1*<sup>(MRI61689/+)</sup> erythrocytes exhibited reduced deformability, making  
296 them more likely to be retained in the filter layer, which is likely to promote their destruction in *in*  
297 *vivo* settings. Therefore, we proposed that *Ank-1*<sup>MRI61689</sup> mutation causes alteration to the  
298 erythrocyte, which renders them more likely to be cleared from the circulation.

299 In summary, we report that ENU-induced *Ank-1*<sup>MRI61689</sup> mutation causes an HS-like phenotype in mice,  
300 and confers significant resistance to *P. chabaudi* infection. We propose that *Ank-1*<sup>(MRI61689/+)</sup>  
301 erythrocytes are significantly resistant to parasite invasion but are able to support normal parasite  
302 intra-erythrocytic growth. We also described a novel observation of increased RBC clearance  
303 associated with this ankyrin mutation. This study emphasizes the importance of RBC cytoskeletal  
304 proteins in mediating multiple complex mechanisms of resistance towards malaria, which provide  
305 further insights to the complex interaction between the host and parasites.

306

## 307 **Methods and Materials**

308 Mice and Ethics Statement

309 All mice used in this study were housed with 12 hour light-dark cycle under constant temperature at  
310 21 °C. All procedures were conformed to the National Health and Medical Research Council (NHMRC)  
311 Australian code of practice. Experiments were performed under ethics agreement AEEC A2014/54,  
312 which were approved by the Australian National University animal ethics committees.

313

#### 314 ENU Mutagenesis and Dominant Phenotype Screening

315 B6.BKS(D)-Lepr<sup>db</sup>/J male mice were injected intraperitoneally with two dose of 100 mg/kg ENU  
316 (Sigma-Aldrich, St Louis, MO) at one week interval for a recessive suppressor screen of db/db  
317 mutation. The treated males (G0) were crossed to females from the isogenic background to produce  
318 the first generation progeny (G1). The seven-week-old G1 progeny were bled and analysed on an  
319 Advia 120 Automated Haematology Analyser (Siemens, Berlin, Germany) to identify abnormal red  
320 blood cell count. Mouse carrying MRI61689 mutation was identified with a “mean corpuscular  
321 volume” (MCV) value three standard deviations lower from other G1 progeny. It was crossed with  
322 B6.BKS(D)-Lepr<sup>db</sup>/J mice to produce G2 progeny to test the heritability of the mutations and the  
323 dominance mode of inheritance. Mice that exhibited low MCV (<48fL) were selected for whole  
324 exome sequencing and genotyping. This abnormal red blood cell count was unrelated to the obesity  
325 phenotype.

326

#### 327 Microscopy

328 For light microscopy, cells were briefly fixed in methanol for one minute and air-dried before being  
329 stained in a 10% Giemsa solution (Sigma-Aldrich, St Louis, MO) at pH 7.4 for 10 minutes. For  
330 scanning electron microscopy (SEM), fresh blood was first fixed immediately upon drawing in 3%  
331 EM-grade glutaraldehyde (Sigma-Aldrich, St Louis, MO) overnight at 4°C. The samples were washed  
332 with mouse tonicity phosphate buffered saline (MT-PBS) (150mM NaCl, 16mM Na<sub>2</sub>HPO<sub>4</sub>, 4mM

333 NaH<sub>2</sub>PO<sub>4</sub>, pH 7.4) 3 times, 10 minutes soak each. The cells were then adhered to the cover slips with  
334 0.1% polyethyleneimine (PEI) for 10 minutes, before washing off with MT-PBS. The cells were then  
335 dried serially using 30%, 50%, 70%, 80%, 90%, 100%, 100% ethanol, each with 10 minutes soak. The  
336 cells were then soaked in 1:1 ethanol: hexamethyldisilazane solution for 10 minutes, followed by 2  
337 washes with 100% hexamethyldisilazane, each 10 minutes. The coverslips were then air-dried  
338 overnight and coated with gold and examined under JEOL JSM-6480LV scanning electron microscope.

339

#### 340 Osmotic Fragility Measurement

341 To assess the susceptibility of RBC membrane to osmotic stress, 5µl of mouse whole blood was  
342 diluted 100-fold with phosphate buffer (pH 7.4) containing 0 to 10g/L of sodium, and incubated for  
343 at least 10 minutes at room temperature. The cells were centrifuged at 800g for 3 minutes, and the  
344 supernatant, which contains free haemoglobin, was measured at 540nm to assess the degree of  
345 haemolysis. The absorbance values were expressed as percentage of haemolysis, with haemolysis at  
346 0g/L sodium considered as 100% lysis.

347

#### 348 *In vitro* spleen retention assay

349 The RBC deformability of both wild-type and *Ank-1*<sup>(MRI61689/+)</sup> were assessed according to the protocol  
350 described previous by Deplaine, et al. <sup>45</sup> with modifications. Briefly, RBCs from wild-type and *Ank-*  
351 *1*<sup>(MRI61689/+)</sup> mice were stained with 10µg/ml of either hydroxysulfosuccinimide Atto 633 (Atto 633) or  
352 hydroxysulfosuccinimide Atto 565 (Atto 565) (Sigma-Aldrich, St Louis, MO), followed by three  
353 washes with in MTRC (154mM NaCl, 5.6mM KCl, 1mM MgCl<sub>2</sub>, 2.2mM CaCl<sub>2</sub>, 20mM HEPES, 10mM  
354 glucose, 4mM EDTA, 0.5% BSA, pH 7.4, filter sterilized). The stained RBCs were mixed in equal  
355 proportion and diluted with unstained wild-type RBCs to give approximately 10-20% of the sample  
356 being labelled RBCs. The samples were further diluted to 1-2% haematocrit with MTRC, before

357 passing through spleen retention filter bed. The pre-filtered and post-filtered samples were analysed  
358 on BD LSRFortessa (BD Biosciences, Franklin Lakes, NJ) flow cytometer to determine the proportion  
359 being retained in the filter bed.

360

361 Whole exome sequencing

362 DNA from two G2 mice carrying the abnormal red blood cell parameters (MCV <48fL) were extracted  
363 with Qiagen DNeasy blood and tissue kit (Qiagen, Venlo, Netherlands) for exome sequencing as  
364 previous described<sup>46</sup>. Briefly, at least 10µg of DNA was prepared for exome enrichment with Agilent  
365 Sure select kit paired-end genomic library from Illumina (San Diego, CA), followed by high  
366 throughput sequencing using a HiSeq 2000 platform. The bioinformatics analysis was conducted  
367 according to the variant filtering method previously described by Bauer, et al.<sup>47</sup>. Private variants  
368 that were shared between the two mutants but not with other B6.BKS(D)-Lepr<sup>db</sup>/J, C57BL/6 mice or  
369 previously described ENU mutants were annotated using ANNOVAR<sup>48</sup>. Private non-synonymous  
370 exonic and intronic variants within 20 bp from the exon splicing sites were retained as potential  
371 candidate ENU mutations.

372

373 PCR and Sanger sequencing

374 DNA from mutant mice were amplified through PCR with 35 cycles of 30 seconds of 95<sup>0</sup>C  
375 denaturation, 30 seconds of 56-58<sup>0</sup>C annealing and 72<sup>0</sup>C elongation for 40 seconds. The primers  
376 used in the PCR are described as below. The PCR products were examined with agarose gel  
377 electrophoresis before being sent to the Australian Genome Research Facility (AGRF) in Melbourne,  
378 Australia, for Sanger sequencing. Logarithm of odds (LOD) score was calculated based on the  
379 number of mice that segregated with the candidate mutations.

380 Primers:



381 *Acp5*-F: 5'-CAGAAGGATGCCTTTGGGTA-3'; *Acp5*-R: 5'-ACCAGCGCTTGGAGATCTTA-3'  
382 *Kcnk1*-F: 5'-GGCCTTTTCCTCCTTACAGA-3'; *Kcnk1*-R: 5'-CAGGAAACGGTGACAAATCC-3'  
383 *Epas1*-F: 5'-GGAAGCCAGAACTTCGATGA-3'; *Epas1*-R: 5'-GTAGTGTTCCCTGGGGTGT-3'  
384 *Picalm*-F: 5'-TCACTGAATGTAATTGGGATATCAT-3'; *Picalm*-R: 5'-CACCTCTCTTCACTTTTGTG-3'  
385 *Socs6*-F: 5'-CCGCTTTGTTATCCGTCACT-3'; *Socs6*-R: 5'-TGGCAGCAAAGACTTCAATG-3'  
386 *Ank1*-F: 5'-TCCCTGGCTTAAAGTTGGTG-3'; *Ank1*-R: 5'-CTCTCCCTTAGCTGCATTCC-3'

387

388 Quantitative PCR and cDNA sequencing

389 RNA was isolated from embryonic livers of E14 embryos using Qiagen RNeasy kit (Qiagen, Venlo,  
390 Netherlands), followed by cDNA synthesis using Transcriptor High Fidelity cDNA Synthesis Kit (Roche,  
391 Basel, Switzerland). Quantitative PCR was carried out on ViiA™ 7 Real-Time PCR System (Thermo  
392 Scientific, Waltham, MA). The  $\Delta\Delta C_T$  method<sup>49</sup> was used to determine the cDNA levels of *Ank-1* and  
393 the housekeeping gene  $\beta$ -actin and expressed as a fold-change of the mutants to the wild-type. The  
394 primers used for *Ank-1* gene spanned exon 2 to 4: *Ank-1*-F: 5'-TAACCAGAACGGGTTGAACG-3'; *Ank-1*-  
395 R: 5'-TGTTCCCTTCTTGGTTGTC-3';  $\beta$ -Actin-F: 5'-TTCTTGCAGCTCCTTCGTTGCCG-3';  $\beta$ -Actin-R: 5'-  
396 TGGATGCGTACGTACATGGCTGGG-3'.

397 To characterize the effect of MRI61689 mutation, cDNA were amplified through PCR using two  
398 primers set were design as shown below: Primer set 1 was designed to amplify wild-type *Ank-1*  
399 transcript, whereas primer set 2 was designed to only amplify the predicted mutant transcript with  
400 11bp insertion. Amplified PCR product were analysed using agarose gel electrophoresis and each  
401 band was purified and sequenced.

402 Primer set 1: Forward: ATGCAGAGTCGGTACAAGGC; Reverse: CCGTTCGAGCTGACCTCATT

403 Primer set 2: Forward: CCTGGGGAACAAGTTTCTTT; Reverse: GTGCAAGGGGCTGTATCCTA

404

405 SDS-PAGE, Coomassie staining and Western blot

406 RBC ghosts were prepared by lysing mouse RBCs with ice-cold 5mM phosphate buffer (pH 7.4) and  
407 centrifuged at 20,000g for 20 minutes followed by removal of the supernatant. The pellet was  
408 further washed with the 5mM phosphate buffer until the supernatant became clear. The RBC ghosts  
409 or whole blood lysates were denatured in SDS-PAGE loading buffer (0.0625M Tris pH 6.8, 2% SDS, 10%  
410 glycerol, 0.1M DTT, 0.01% bromophenol blue) at 95°C for 5 minutes before loading onto a Mini-  
411 PROTEAN® TGX™ Precast Gels (Bio-Rad, Hercules, CA). The gels were then either stained with  
412 Coomassie blue solution (45% v/v methanol, 7% v/v acetic acid, 0.25% w/v Brilliant Blue G) overnight  
413 or transferred to a nitrocellulose membrane. The western blot was carried out using these primary  
414 antibodies: anti-alpha 1 spectrin (clone 17C7), anti-beta 1 spectrin (clone 4C3) (Abcam, Cambridge,  
415 UK), anti-GAPDH (clone 6C5) (Merck Millipore, Darmstadt, Germany), anti-N-terminal *Ank-1* "p89",  
416 anti-Band 3 and anti-protein 4.2 (kind gifts from Connie Birkenmeier, Jackson Laboratory, US).

417

418 Malaria infection

419 250µl of thawed *P. chabaudi adami* infected blood was injected into the intraperitoneal cavity of a  
420 C57BL/6 donor mouse. When the donor mouse reached 1-10% parasite load (parasitemia), blood  
421 was collected through cardiac puncture. The parasitized blood was diluted with Krebs' buffered  
422 saline with 0.2% glucose as described previously<sup>50</sup>. Each experimental mouse was infected with  
423  $1 \times 10^4$  parasites intraperitoneally. The parasitemia of these mice were monitored either using light  
424 microscopy or flow cytometry.

425

426 Terminal deoxynucleotidyl transferase dUTP nick end labelling (TUNEL) staining

427 3µl of infected blood containing 1-10% parasitemia were collected during trophozoite stage and  
428 fixed in 1 in 4 diluted BD Cytofix™ Fixation Buffer (BD Biosciences, Franklin Lakes, NJ) for at least day  
429 until they were needed. Each sample was then washed twice with MT-PBS, and adhered to a glass  
430 slide pre-coated with 0.1% polyethylenimine (PEI) for 10 minutes at room temperature. The excess  
431 cells were washed off with the wash solution from APO-BrdU TUNEL assay kit (Thermo Scientific,  
432 Waltham, MA) and incubated overnight at room temperature with TUNEL labelling solution (1mM  
433 Cobalt Chloride, 25mM Tris-HCl pH 6.6, 200mM sodium cacodylate, 0.25mg/ml BSA, 60uM BrdUTP,  
434 15U Terminal transferase). The slides were washed three times with rinse buffer from APO-BrdU  
435 TUNEL assay kit, followed by staining with 50µg/ml of anti-BrdU-Biotin antibody (Novus Biologicals,  
436 Littleton, CO) in MT-PBT (MT-PBS, 0.5% BSA, 0.05% Triton X-100) for 1 hour. The slides were then  
437 washed three times with MT-PBT, followed by probing with 2µg/ml Alexa Fluor® 594 conjugated  
438 streptavidin (Thermo Scientific, Waltham, MA). Next, they were washed three times with MT-PBS  
439 and mounted with SlowFade® Gold antifade reagent with DAPI (Thermo Scientific, Waltham, MA)  
440 and sealed. When the slides were dried, they were examined using Axioplan 2 fluorescence light  
441 microscope (Carl Zeiss, Oberkochen, Germany) between 600x to 1000x magnification. At least 100  
442 DAPI-positive cells were counted, and each was graded as either positive or negative for TUNEL  
443 staining, as an indication of DNA fragmentation.

444

#### 445 *In vivo* erythrocyte tracking (IVET) assays

446 The IVET assay was carried out as previously described by Lelliott, et al.<sup>51,52</sup>. Briefly, 1.5ml to 2ml of  
447 whole blood was collected from wild-type and *Ank-1*<sup>(MRI61689/+)</sup> mice via cardiac puncture. Both wild-  
448 type and *Ank-1*<sup>(MRI61689/+)</sup> blood were either stained with 10µg/ml of Atto 633 or 125µg/ml of EZ-  
449 Link™ Sulfo-NHS-LC-Biotin (Biotin) (Thermo Scientific, Waltham, MA) for 45 minutes at room  
450 temperature, followed by washing three times with MT-PBS. The *Ank-1*<sup>(MRI61689/+)</sup> blood was mixed  
451 with wild-type blood in two different dye combinations to correct for any dye effects.  $1 \times 10^9$

452 erythrocytes were injected intravenously into infected wild-type mice at 1-5% parasitemia during  
453 schizogony stage, usually 8-10 days post-infection with  $1 \times 10^4$  parasites. Blood samples were  
454 collected at 30 minutes, 3 hours, 12 hours, 20 hours and 36 hours after injection. The ratio of  
455 infected *Ank-1*<sup>(MRI61689/+)</sup> to wild-type erythrocytes was determined on flow cytometry, as an  
456 indication of the relative susceptibility to malaria infections between wild-type and *Ank-1*<sup>(MRI61689/+)</sup>  
457 mice. The proportion of labelled blood populations were also tracked over time to determine the  
458 clearance of these RBCs from the circulation.

459

460 Flow cytometry analysis of blood samples

461 For both malaria infections and IVET assay, 2  $\mu$ l of whole blood samples were stained with 2  $\mu$ g/ml  
462 streptavidin-PE-Cy7 (only for experiments with biotinylated erythrocytes), 1  $\mu$ g/ml anti-CD45-  
463 allophycocyanin (APC)-eFluor 780 (clone 30-F11), 1  $\mu$ g/ml anti-CD71 (TFR1)-PerCP-eFluor 710 (clone  
464 R17217) (eBioscience, San Diego, CA), 4  $\mu$ M Hoechst 33342 (Sigma-Aldrich, St Louis, MO) and 12  $\mu$ M  
465 JC-1 (Thermo Scientific, Waltham, MA) in MTRC. All samples analysed through flow cytometry were  
466 performed on BD LSRFortessa (BD Biosciences, Franklin Lakes, NJ), where 100,000 to 2,000,000  
467 events were collected and visualized on FACSDiva<sup>TM</sup> and FlowJo software. The RBCs and leukocytes  
468 were first selected on forward scatter and side scatter channels (FSC/SSC) signals, followed by gating  
469 of single cells based on FS area to height ratio. RBCs were further isolated by gating on CD71  
470 negative and CD45 negative population, followed by gating on Atto-labelled and Biotin-labelled  
471 erythrocytes on appropriate channels (APC for Atto-633, PE for Atto-565 and PE-Cy7 for Biotin). The  
472 parasitemia of each labelled erythrocyte population was determined by gating on Hoechst 33342  
473 positive and JC-1 positive population.

474

475 Statistical analysis

476 The LOD score method coupled with Bonferroni correction was used to determine the causative  
477 mutation for MRI61689. The statistical significance of the malaria survival was tested using the Log-  
478 Rank test. The statistical significance of parasite infection was determined via the statmod software  
479 package for R (<http://bioinf.wehi.edu.au/software/compareCurves>) using the  
480 'compareGrowthCurves' function with 10,000 permutation, followed by adjustments for multiple  
481 testing. The statistical significance for the ratios of IVET assays was determined using the one sample  
482 t-test with hypothetical mean of 1. For the rest of the results, statistical significance was determined  
483 using two-tailed Students t-tests.

484

## 485 References

- 486 1 W.H.O. *World Malaria Report 2015*. (World Health Organisation (WHO), 2015).
- 487 2 Kwiatkowski, D. P. How malaria has affected the human genome and what human genetics  
488 can teach us about malaria. *Am J Hum Genet* **77**, 171-192 (2005).
- 489 3 Piel, F. B. *et al.* Global distribution of the sickle cell gene and geographical confirmation of  
490 the malaria hypothesis. *Nature communications* **1**, 104, doi:10.1038/ncomms1104 (2010).
- 491 4 Carter, R. & Mendis, K. N. Evolutionary and historical aspects of the burden of malaria. *Clin*  
492 *Microbiol Rev* **15**, 564-594 (2002).
- 493 5 Zimmerman, P. A. *et al.* Emergence of FY\*A(null) in a Plasmodium vivax-endemic region of  
494 Papua New Guinea. *Proc Natl Acad Sci U S A* **96**, 13973-13977 (1999).
- 495 6 Miller, L. H., Mason, S. J., Clyde, D. F. & McGinniss, M. H. The Resistance Factor to  
496 Plasmodium vivax in Blacks. *New England Journal of Medicine* **295**, 302-304,  
497 doi:doi:10.1056/NEJM197608052950602 (1976).
- 498 7 Cyrklaff, M. *et al.* Hemoglobins S and C interfere with actin remodeling in Plasmodium  
499 falciparum-infected erythrocytes. *Science* **334**, 1283-1286, doi:10.1126/science.1213775  
500 (2011).
- 501 8 Allen, S. J. *et al.* Prevention of cerebral malaria in children in Papua New Guinea by  
502 southeast Asian ovalocytosis band 3. *Am J Trop Med Hyg* **60**, 1056-1060 (1999).
- 503 9 Jarolim, P. *et al.* Deletion in erythrocyte band 3 gene in malaria-resistant Southeast Asian  
504 ovalocytosis. *Proceedings of the National Academy of Sciences of the United States of*  
505 *America* **88**, 11022-11026 (1991).
- 506 10 Mgone, C. S. *et al.* Occurrence of the erythrocyte band 3 (AE1) gene deletion in relation to  
507 malaria endemicity in Papua New Guinea. *Trans R Soc Trop Med Hyg* **90**, 228-231 (1996).
- 508 11 Genton, B. *et al.* Ovalocytosis and cerebral malaria. *Nature* **378**, 564-565,  
509 doi:10.1038/378564a0 [doi] (1995).
- 510 12 Lecomte, M. C. *et al.* [Hereditary elliptocytosis in West Africa: frequency and repartition of  
511 spectrin variants]. *C R Acad Sci III* **306**, 43-46 (1988).
- 512 13 Facer, C. A. Erythrocytes carrying mutations in spectrin and protein 4.1 show differing  
513 sensitivities to invasion by Plasmodium falciparum. *Parasitol Res* **81**, 52-57 (1995).

- 514 14 Kidson, C., Lamont, G., Saul, A. & Nurse, G. T. Ovalocytic erythrocytes from Melanesians are  
515 resistant to invasion by malaria parasites in culture. *Proceedings of the National Academy of*  
516 *Sciences of the United States of America* **78**, 5829-5832 (1981).
- 517 15 Hadley, T. *et al.* Resistance of Melanesian elliptocytes (ovalocytes) to invasion by  
518 *Plasmodium knowlesi* and *Plasmodium falciparum* malaria parasites in vitro. *J Clin Invest* **71**,  
519 780-782 (1983).
- 520 16 Schulman, S. *et al.* Growth of *Plasmodium falciparum* in human erythrocytes containing  
521 abnormal membrane proteins. *Proc Natl Acad Sci U S A* **87**, 7339-7343 (1990).
- 522 17 Chishti, A. H., Palek, J., Fisher, D., Maalouf, G. J. & Liu, S. C. Reduced invasion and growth of  
523 *Plasmodium falciparum* into elliptocytic red blood cells with a combined deficiency of  
524 protein 4.1, glycophorin C, and p55. *Blood* **87**, 3462-3469 (1996).
- 525 18 Cortes, A., Benet, A., Cooke, B. M., Barnwell, J. W. & Reeder, J. C. Ability of *Plasmodium*  
526 *falciparum* to invade Southeast Asian ovalocytes varies between parasite lines. *Blood* **104**,  
527 2961-2966, doi:10.1182/blood-2004-06-2136 2004-06-2136 [pii] (2004).
- 528 19 Dua, M., Raphael, P., Sijwali, P. S., Rosenthal, P. J. & Hanspal, M. Recombinant falcipain-2  
529 cleaves erythrocyte membrane ankyrin and protein 4.1. *Mol Biochem Parasitol* **116**, 95-99  
530 (2001).
- 531 20 Nicolas, V. *et al.* Rh-RhAG/Ankyrin-R, a New Interaction Site between the Membrane Bilayer  
532 and the Red Cell Skeleton, Is Impaired by Rhnull-associated Mutation. *Journal of Biological*  
533 *Chemistry* **278**, 25526-25533, doi:10.1074/jbc.M302816200 (2003).
- 534 21 Grey, J. L., Kodippili, G. C., Simon, K. & Low, P. S. Identification of contact sites between  
535 ankyrin and band 3 in the human erythrocyte membrane. *Biochemistry* **51**, 6838-6846,  
536 doi:10.1021/bi300693k (2012).
- 537 22 Su, Y. *et al.* Associations of protein 4.2 with band 3 and ankyrin. *Molecular and cellular*  
538 *biochemistry* **289**, 159-166, doi:10.1007/s11010-006-9159-x (2006).
- 539 23 Eber, S. W. *et al.* Ankyrin-1 mutations are a major cause of dominant and recessive  
540 hereditary spherocytosis. *Nat Genet* **13**, 214-218, doi:10.1038/ng0696-214 (1996).
- 541 24 Casale, M. & Perrotta, S. Splenectomy for hereditary spherocytosis: complete, partial or not  
542 at all? *Expert review of hematology* **4**, 627-635, doi:10.1586/ehm.11.51 (2011).
- 543 25 Godal, H. C. & Heisto, H. High prevalence of increased osmotic fragility of red blood cells  
544 among Norwegian blood donors. *Scandinavian journal of haematology* **27**, 30-34 (1981).
- 545 26 Eber, S. W., Pekrun, A., Neufeldt, A. & Schroter, W. Prevalence of increased osmotic fragility  
546 of erythrocytes in German blood donors: screening using a modified glycerol lysis test.  
547 *Annals of hematology* **64**, 88-92 (1992).
- 548 27 Jensson, O., Jonasson, J. L. & Magnusson, S. Studies on hereditary spherocytosis in Iceland.  
549 *Acta medica Scandinavica* **201**, 187-195 (1977).
- 550 28 Yawata, Y. *et al.* Characteristic features of the genotype and phenotype of hereditary  
551 spherocytosis in the Japanese population. *Int J Hematol* **71**, 118-135 (2000).
- 552 29 Glele-Kakai, C. *et al.* Epidemiological studies of spectrin mutations related to hereditary  
553 elliptocytosis and spectrin polymorphisms in Benin. *Br J Haematol* **95**, 57-66 (1996).
- 554 30 Shear, H. L., Roth, E. F., Jr., Ng, C. & Nagel, R. L. Resistance to malaria in ankyrin and spectrin  
555 deficient mice. *Br J Haematol* **78**, 555-560 (1991).
- 556 31 Greth, A. *et al.* A novel ENU-mutation in ankyrin-1 disrupts malaria parasite maturation in  
557 red blood cells of mice. *PLoS One* **7**, e38999, doi:10.1371/journal.pone.0038999 (2012).
- 558 32 Rank, G. *et al.* Novel roles for erythroid Ankyrin-1 revealed through an ENU-induced null  
559 mouse mutant. *Blood* **113**, 3352-3362, doi:blood-2008-08-172841 [pii] 10.1182/blood-2008-  
560 08-172841 (2009).
- 561 33 Stephens, R., Culleton, R. L. & Lamb, T. J. The contribution of *Plasmodium chabaudi* to our  
562 understanding of malaria. *Trends in Parasitology* **28**, 73-82, doi:10.1016/j.pt.2011.10.006  
563 (2012).

- 564 34 Ayi, K., Turrini, F., Piga, A. & Arese, P. Enhanced phagocytosis of ring-parasitized mutant  
565 erythrocytes: a common mechanism that may explain protection against falciparum malaria  
566 in sickle trait and beta-thalassemia trait. *Blood* **104**, 3364-3371, doi:10.1182/blood-2003-11-  
567 3820 (2004).
- 568 35 McMorran, B. J. *et al.* Platelets Kill Intraerythrocytic Malarial Parasites and Mediate Survival  
569 to Infection. *Science* **323**, 797-800, doi:10.1126/science.1166296 (2009).
- 570 36 Gallagher, P. G. Hematologically important mutations: ankyrin variants in hereditary  
571 spherocytosis. *Blood Cells Mol Dis* **35**, 345-347, doi:10.1016/j.bcmd.2005.08.008 (2005).
- 572 37 Nakanishi, H., Kanzaki, A., Yawata, A., Yamada, O. & Yawata, Y. Ankyrin gene mutations in  
573 Japanese patients with hereditary spherocytosis. *Int J Hematol* **73**, 54-63 (2001).
- 574 38 Edelman, E. J., Maksimova, Y., Duru, F., Altay, C. & Gallagher, P. G. A complex splicing defect  
575 associated with homozygous ankyrin-deficient hereditary spherocytosis. *Blood* **109**, 5491-  
576 5493, doi:10.1182/blood-2006-09-046573 (2007).
- 577 39 Kyrylkova, K., Kyryachenko, S., Leid, M. & Kioussi, C. Detection of apoptosis by TUNEL assay.  
578 *Methods Mol Biol* **887**, 41-47, doi:10.1007/978-1-61779-860-3\_5 (2012).
- 579 40 Straat, M., van Bruggen, R., de Korte, D. & Juffermans, N. P. Red blood cell clearance in  
580 inflammation. *Transfusion medicine and hemotherapy : offizielles Organ der Deutschen*  
581 *Gesellschaft fur Transfusionsmedizin und Immunhamatologie* **39**, 353-361,  
582 doi:10.1159/000342229 (2012).
- 583 41 Jakeman, G., Saul, A., Hogarth, W. & Collins, W. Anaemia of acute malaria infections in non-  
584 immune patients primarily results from destruction of uninfected erythrocytes. *Parasitology*  
585 **119**, 127-133 (1999).
- 586 42 Lamikanra, A. A. *et al.* Malarial anemia: of mice and men. *Blood* **110**, 18-28 (2007).
- 587 43 Dondorp, A. M. *et al.* Prognostic significance of reduced red blood cell deformability in  
588 severe falciparum malaria. *Am J Trop Med Hyg* **57**, 507-511 (1997).
- 589 44 Dondorp, A. *et al.* The role of reduced red cell deformability in the pathogenesis of severe  
590 falciparum malaria and its restoration by blood transfusion. *Transactions of the Royal Society*  
591 *of Tropical Medicine and Hygiene* **96**, 282-286 (2002).
- 592 45 Deplaine, G. *et al.* The sensing of poorly deformable red blood cells by the human spleen can  
593 be mimicked in vitro. *Blood* **117**, e88-95, doi:10.1182/blood-2010-10-312801 (2011).
- 594 46 Hurtle, E. *et al.* Adenosine monophosphate deaminase 3 activation shortens erythrocyte  
595 half-life and provides malaria resistance in mice. *Blood*, doi:10.1182/blood-2015-09-666834  
596 (2016).
- 597 47 Bauer, D. C., McMorran, B. J., Foote, S. J. & Burgio, G. Genome-wide analysis of chemically  
598 induced mutations in mouse in phenotype-driven screens. *BMC Genomics* **16**, 1-8,  
599 doi:10.1186/s12864-015-2073-4 (2015).
- 600 48 Wang, K., Li, M. & Hakonarson, H. ANNOVAR: functional annotation of genetic variants from  
601 high-throughput sequencing data. *Nucleic Acids Research* **38**, e164-e164,  
602 doi:10.1093/nar/gkq603 (2010).
- 603 49 Livak, K. J. & Schmittgen, T. D. Analysis of relative gene expression data using real-time  
604 quantitative PCR and the 2- $\Delta\Delta$ CT method. *methods* **25**, 402-408 (2001).
- 605 50 Jarra, W. & Brown, K. Protective immunity to malaria: studies with cloned lines of  
606 *Plasmodium chabaudi* and *P. berghei* in CBA/Ca mice. I. The effectiveness and inter- and  
607 intra- species specificity of immunity induced by infection. *Parasite immunology* **7**, 595-606  
608 (1985).
- 609 51 Lelliott, P. M., Lampkin, S., McMorran, B. J., Foote, S. J. & Burgio, G. A flow cytometric assay  
610 to quantify invasion of red blood cells by rodent *Plasmodium* parasites in vivo. *Malar J* **13**,  
611 100, doi:10.1186/1475-2875-13-100 (2014).
- 612 52 Lelliott, P. M., McMorran, B. J., Foote, S. J. & Burgio, G. In vivo assessment of rodent  
613 *Plasmodium* parasitemia and merozoite invasion by flow cytometry. *JoVE (Journal of*  
614 *Visualized Experiments)*, e52736-e52736 (2015).

615

616 **Acknowledgement**

617 We would like to acknowledge Shelley Lampkin and Australian Phenomics Facility (APF) for the  
618 maintenance of the mouse colonies. This study was funded by the National Health and Medical  
619 Research Council of Australia (Program Grant 490037, and Project Grants 605524 and APP1047090),  
620 Australian Society of Parasitology (ASP), OzEMalaR, National Collaborative Research Infrastructure  
621 Strategy (NCRIS), the Education Investment Fund from the Department of Education and Training,  
622 the Australian Phenomics Network, Howard Hughes Medical Institute and the Bill and Melinda Gates  
623 Foundation.

624

625

626



627 **Figure Legends**

628 **Figure 1. The phenotypic characterisation of *Ank-1*<sup>(MRI61689/+)</sup> mice.** The morphology of *Ank-1*<sup>(MRI61689/+)</sup>  
629 and *Ank-1*<sup>(MRI61689/MRI61689)</sup> erythrocytes under light microscopy with Giemsa stain (a) and scanning  
630 electron microscopy (b). The osmotic fragility curve of wild-type and *Ank-1*<sup>(MRI61689/+)</sup> erythrocytes  
631 when subjected to osmotic stress (c) (n=5-7 per group). The *in-vitro* spleen retention rate of wild-  
632 type and *Ank-1*<sup>(MRI61689/+)</sup> erythrocytes when passing through filter beds (d) (n=3 per group). \*\*  
633 indicates P<0.01, \*\*\* indicates P<0.001, and all error bars are standard error of mean (SEM).

634

635 **Figure 2. The identification of *Ank-1*<sup>(MRI61689)</sup> mutation and its effects on transcription.** The  
636 sequencing of *Ank-1*<sup>(MRI61689)</sup> mutation, showing a T to A transversion (a). Gel electrophoresis of  
637 amplified cDNA product from wild-type, *Ank-1*<sup>(MRI61689/+)</sup> and *Ank-1*<sup>(MRI61689/MRI61689)</sup> embryonic livers  
638 with primers that spanned the exon 17 to 21 of ankyrin-1 cDNA (primer set 1) (b). The sequencing  
639 results of both bands, showing exon skipping in the abnormal transcript of *Ank-1*<sup>(MRI61689/MRI61689)</sup>  
640 embryonic liver (c). Gel electrophoresis of amplified cDNA product from wild-type, *Ank-1*<sup>(MRI61689/+)</sup>  
641 and *Ank-1*<sup>(MRI61689/MRI61689)</sup> embryonic livers with primers that contained the predicted 11bp insertion  
642 (primer set 2) (d). Sequencing result showing an 11bp insertion between exon 17 and 18 cDNA of the  
643 *Ank-1*<sup>(MRI61689)</sup> transcript (e). The predicted effect of the insertion on the translation of ankyrin-1,  
644 showing a frameshift and a premature chain termination (f).

645

646 **Figure 3. The effect of *Ank-1*<sup>(MRI61689)</sup> mutation on the *Ank-1* expression.** Quantitative PCR showing  
647 the ankyrin-1 mRNA levels in both *Ank-1*<sup>(MRI61689/+)</sup> and *Ank-1*<sup>(MRI61689/MRI61689)</sup> embryonic liver (a). The  
648 protein levels of various cytoskeletal proteins examined with both Coomassie (b) and Western blot  
649 (c). The relative protein levels of ankyrin-1 calculated from the western blot (d) (n=3 per group).  
650 Error bars indicate SEM.

651

652 **Figure 4. The response of *Ank-1*<sup>(MRI61689/+)</sup> mice to malaria infection.** The parasite load of wild-type  
653 and *Ank-1*<sup>(MRI61689/+)</sup> mice when infected with  $1 \times 10^4$  *P. chabaudi* (a) and the associated survival curve  
654 (b). To determine the mechanisms of resistance, parasite intra-erythrocytic growth was assessed  
655 through TUNEL assay at 1-10% parasitemia during late trophozoite stage, as visualised from  
656 immunofluorescent images showing presence of parasites and TUNEL-positive parasites (c). The  
657 number of TUNEL-positive parasites in both wild-type and *Ank-1*<sup>(MRI61689/+)</sup> mice were counted and  
658 expressed as a percentage (d) (n=3). For parasite invasion and RBC clearance, The IVET assay was  
659 done showing the ratio of infected *Ank-1*<sup>(MRI61689/+)</sup> to wild-type erythrocytes over 36 hours (e) and  
660 the relative number *Ank-1*<sup>(MRI61689/+)</sup> and wild-type erythrocyte in both infected and uninfected mice  
661 (f) during *P. chabaudi* infection (n=7). \*\* indicates P<0.01, \*\*\* indicates P<0.001, ## and ###  
662 indicates P<0.01 and P<0.001 respectively when compared to wild-type RBC number in infected mice,  
663 whereas ^^ indicates P<0.01 when compared to *Ank-1*<sup>(MRI61689/+)</sup> RBC number in uninfected mice.  
664 Error bars indicate SEM.

665

666 **Tables**

|                                      | WBC<br>( $\times 10^6$ /ml) | RBC<br>( $\times 10^9$ /ml) | HGB<br>(g/L)    | MCV<br>(fL)    | MCH<br>(pg)    | MCHC<br>(g/L)   | PLT<br>( $\times 10^6$ /ml) | %Retics         |
|--------------------------------------|-----------------------------|-----------------------------|-----------------|----------------|----------------|-----------------|-----------------------------|-----------------|
| Wild type                            | 8.7 $\pm$ 0.5               | 10.5 $\pm$ 0.1              | 153.2 $\pm$ 2.2 | 51.4 $\pm$ 0.4 | 14.6 $\pm$ 0.1 | 283.6 $\pm$ 2.8 | 1151 $\pm$ 57               | 2.69 $\pm$ 0.26 |
| <i>Ank-1</i> <sup>(MRI61689/+)</sup> | 11.9 $\pm$ 4.5              | 11.1 $\pm$ 0.1              | 151.2 $\pm$ 1.4 | 46.1 $\pm$ 0.2 | 13.5 $\pm$ 0.1 | 281.4 $\pm$ 9.3 | 1151 $\pm$ 61               | 2.24 $\pm$ 0.21 |
| p-values                             | NS                          | P<0.01                      | NS              | P<0.001        | P<0.001        | NS              | NS                          | NS              |

667

668 **Table 1. The complete blood count of *Ank-1*<sup>(MRI61689/+)</sup> mice.** The haematological parameters of *Ank-*  
669 *1*<sup>(MRI61689/+)</sup> compared to wild-type mice (n=19-25). WBC = white blood cell count; RBC = red blood cell  
670 count; HGB = haemoglobin; MCV = mean corpuscular volume; MCH = mean corpuscular  
671 haemoglobin; MCHC = mean corpuscular haemoglobin concentration; PLT = platelet  
672 concentration; %Retics = percentage of reticulocytes.

673

| Chromosome | Gene name | Location  | Reference base | Variant base | Number of mutant mice with mutation | LOD score (Threshold: 2.08) |
|------------|-----------|-----------|----------------|--------------|-------------------------------------|-----------------------------|
| 9          | Acp5      | 22129643  | C              | A            | (3/8)                               | -0.32                       |
| 8          | Kcnk1     | 126025024 | C              | T            | (4/8)                               | 0                           |
| 17         | Epas1     | 86825679  | A              | T            | (0/8)                               | -2.33                       |
| 7          | Picalm    | 90165538  | G              | T            | (0/8)                               | -2.33                       |
| 18         | Socs6     | 88869240  | A              | G            | (5/8)                               | 0.32                        |
| 8          | Ank1      | 23106019  | T              | A            | (8/8)                               | 2.33                        |

674

675 **Table 2: The identification of MRI61689 mutation.** Six variants were selected from the exome  
676 sequencing, each mutation was sequenced in *Ank-1*<sup>(MRI61689/+)</sup> mice and the number of mutant mice  
677 carrying each mutation was determined and LOD score was calculated, with LOD threshold being  
678 2.08 (n=8).

679

680

# Figure 1

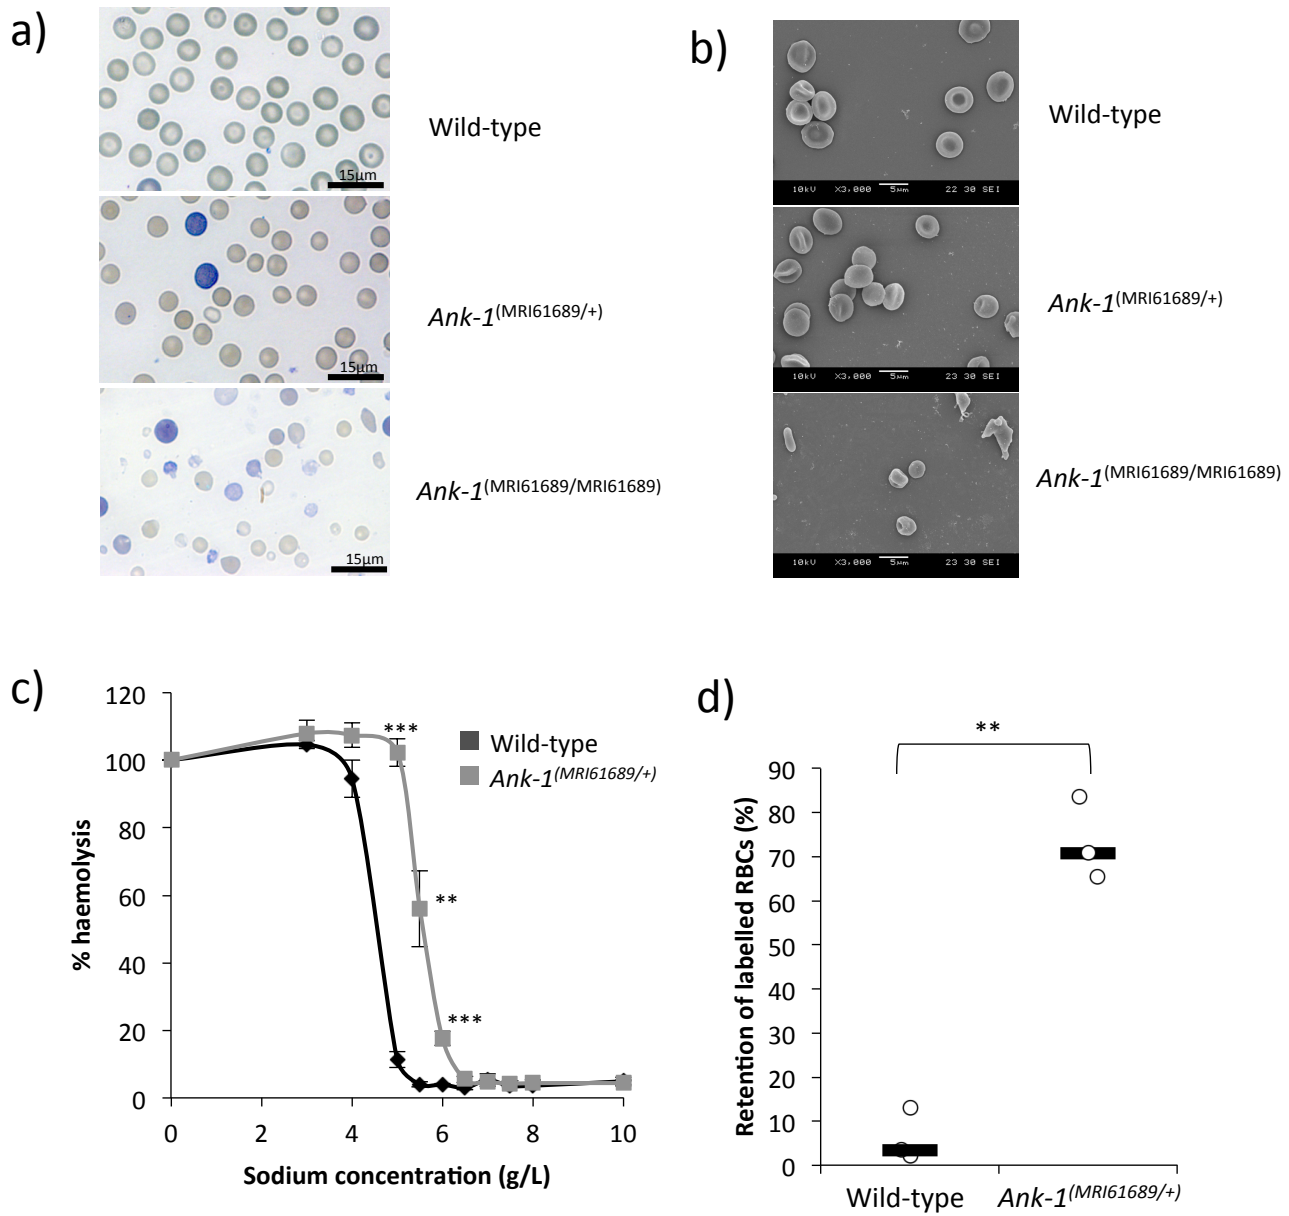

Figure 2

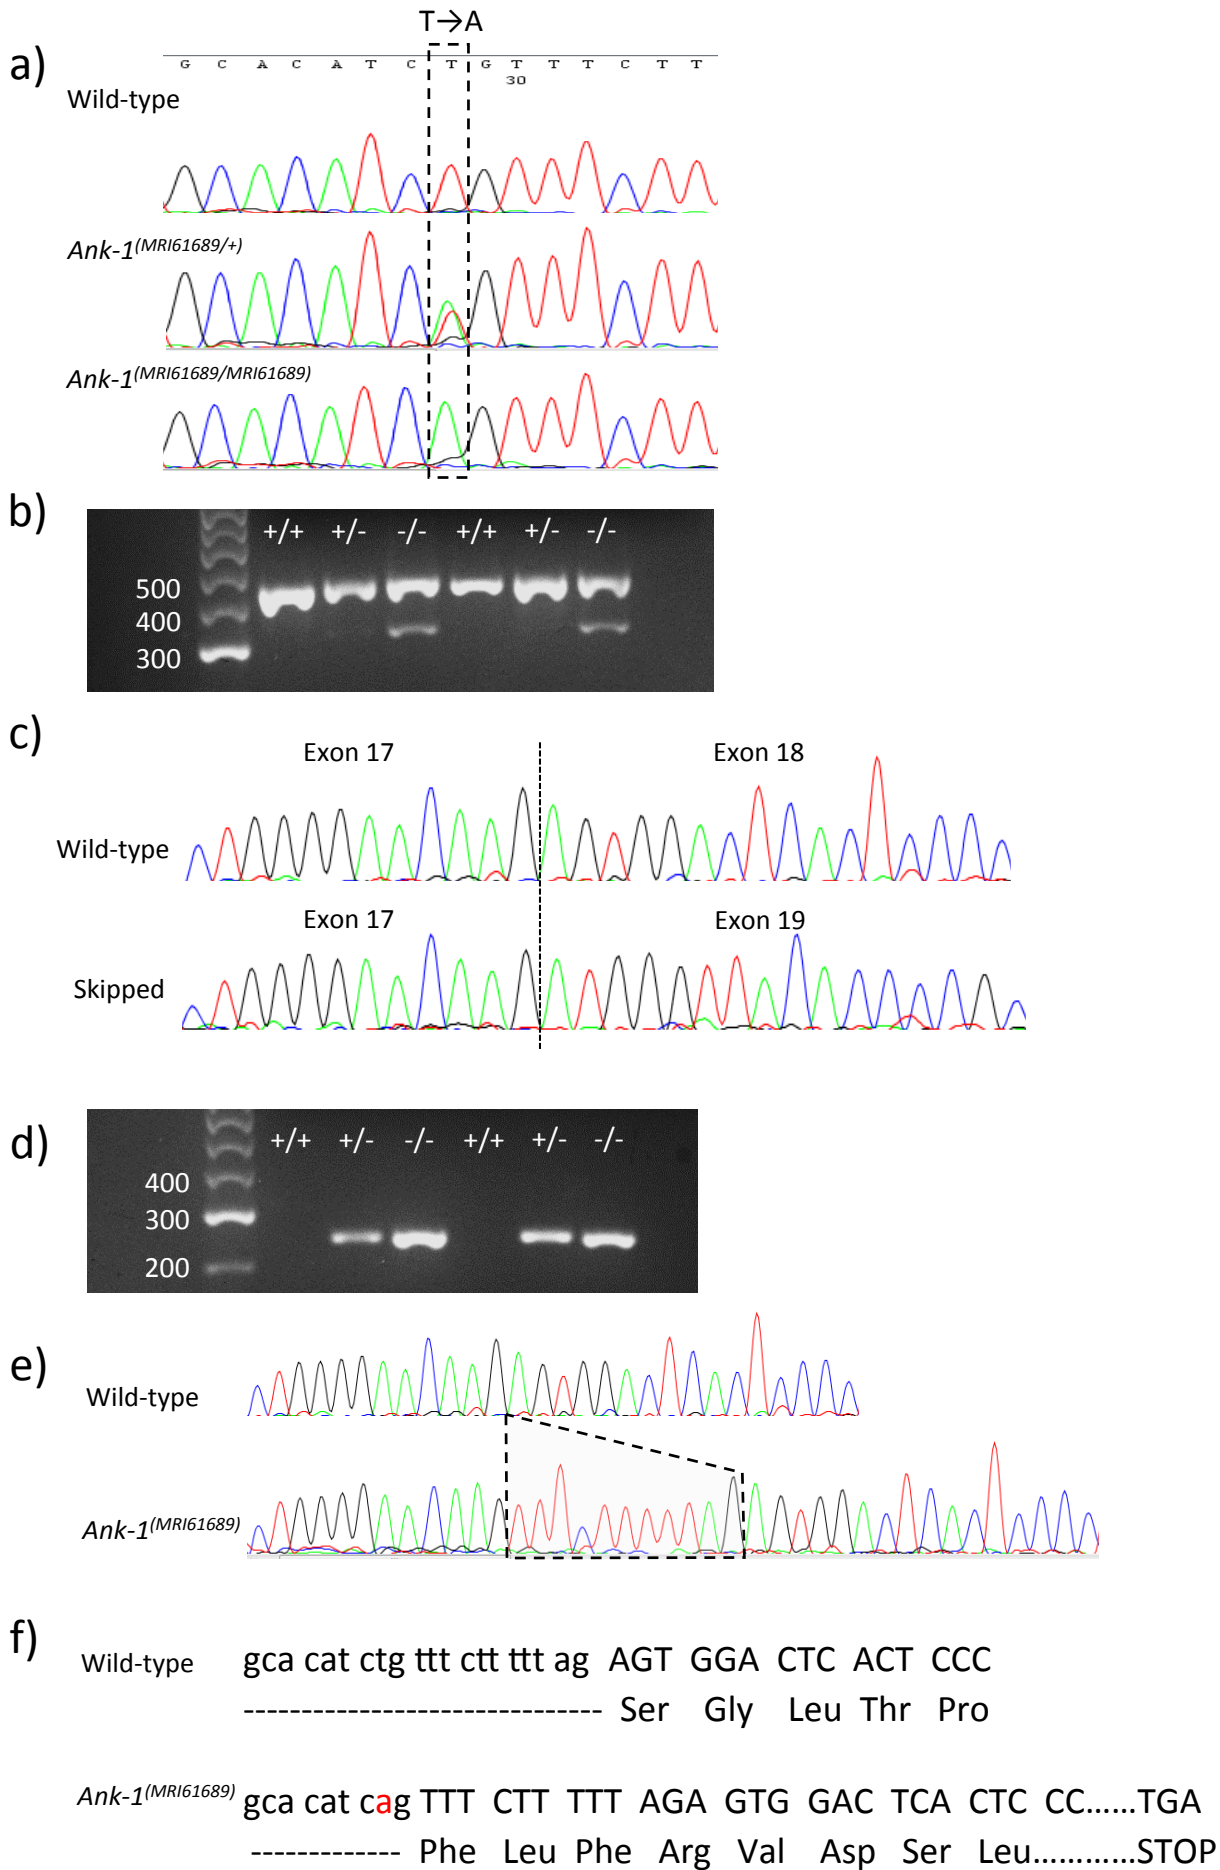

Figure 3

a) *Ank1* gene expression in embryonic liver

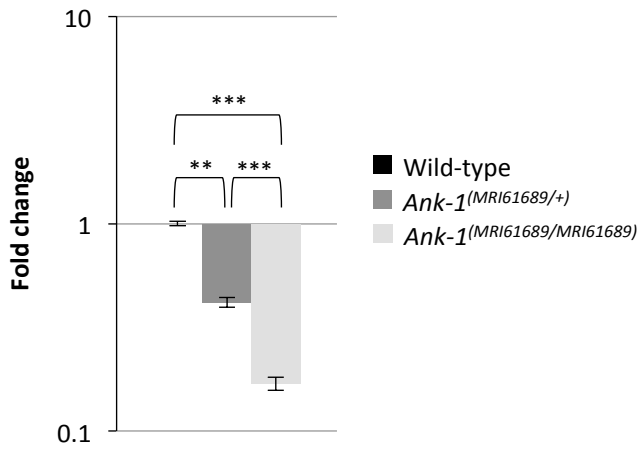

b) Whole blood lysate RBC ghosts

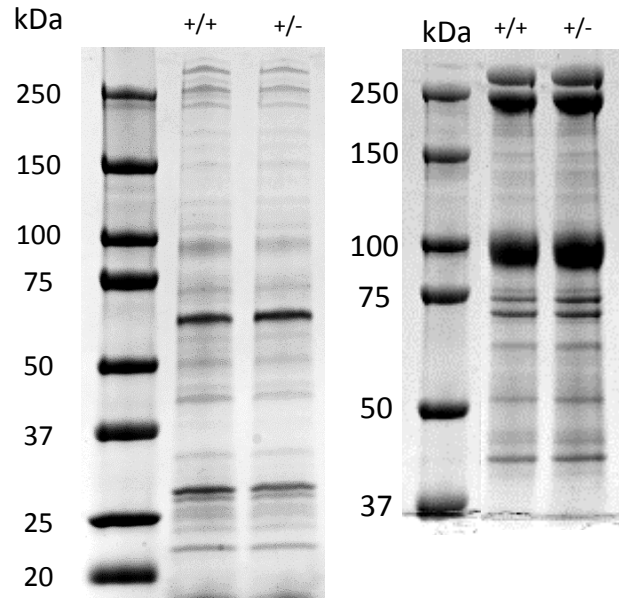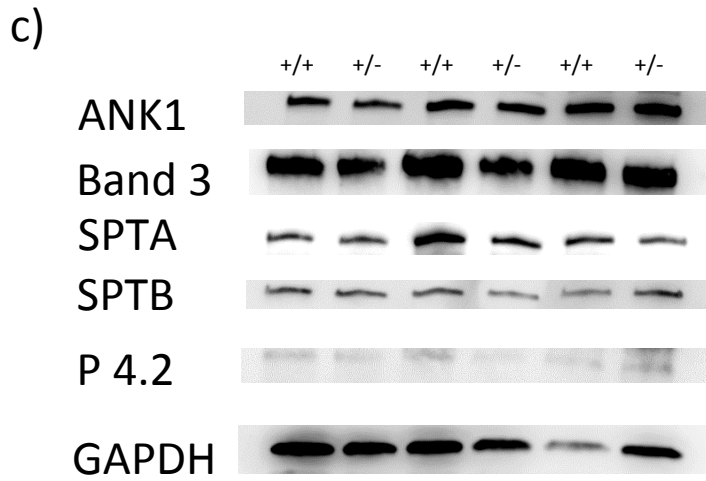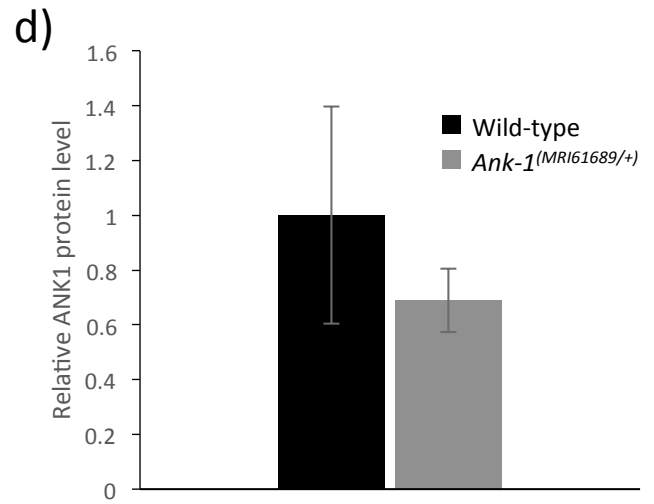

Figure 4

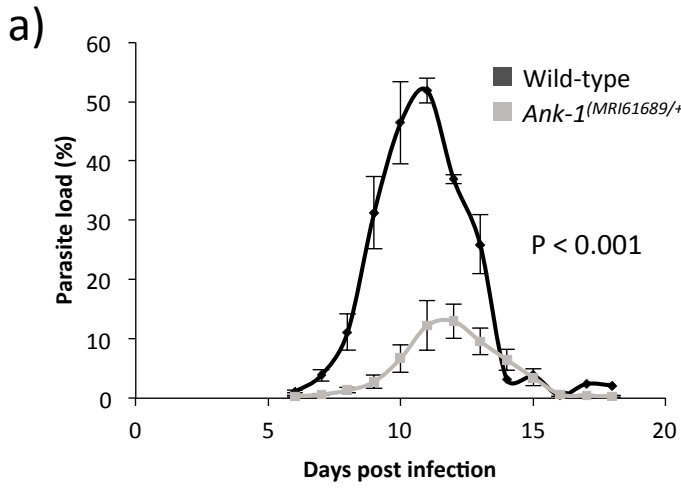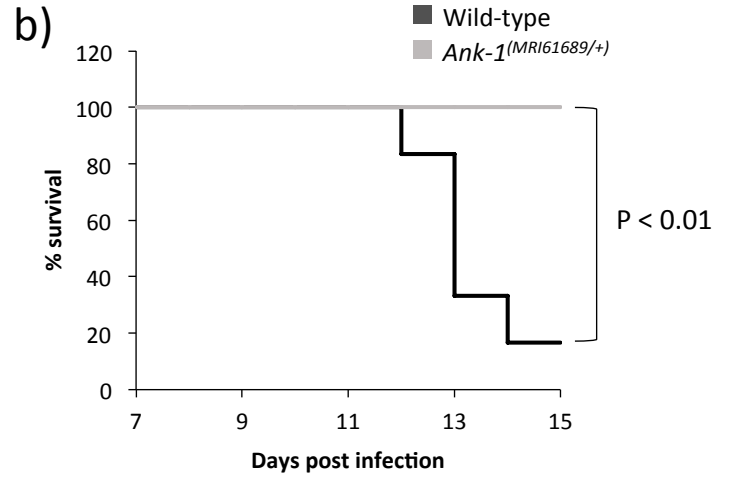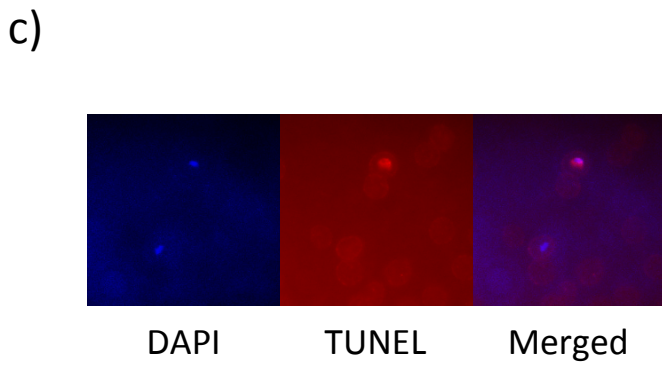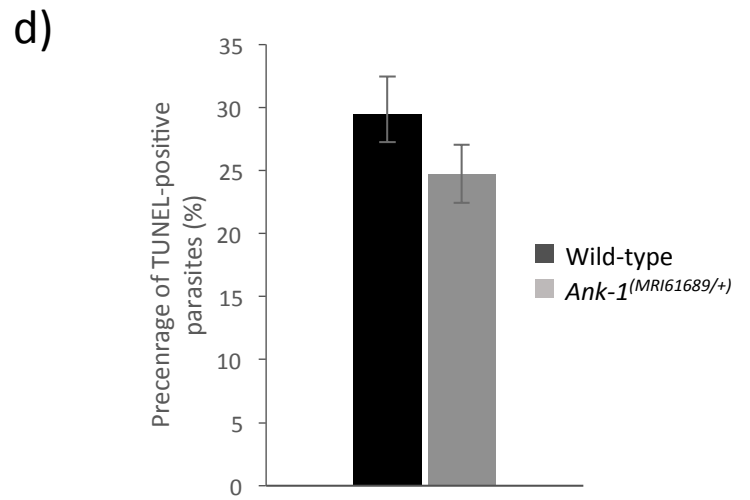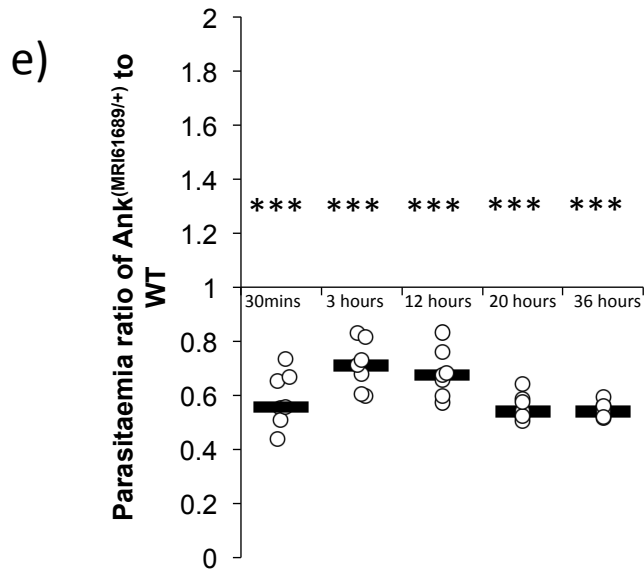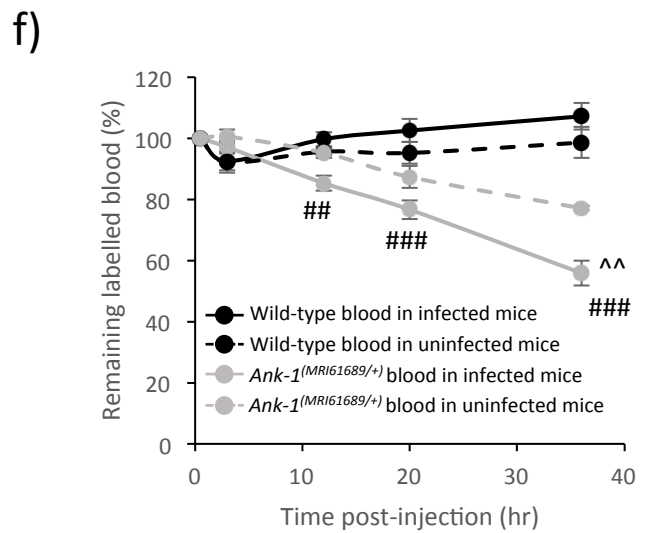

Source: https://www.biorxiv.org/content/10.1101/072587v1.full.pdf
